# Supplementary material
Source: MDPI journal article supplement (https://www.mdpi.com/2227-9717/10/10/2008)

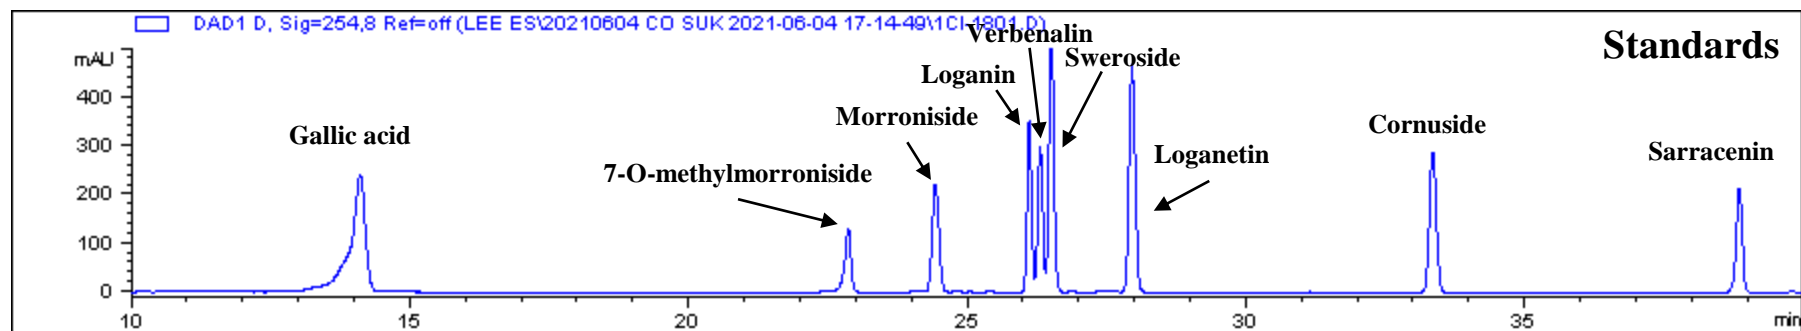

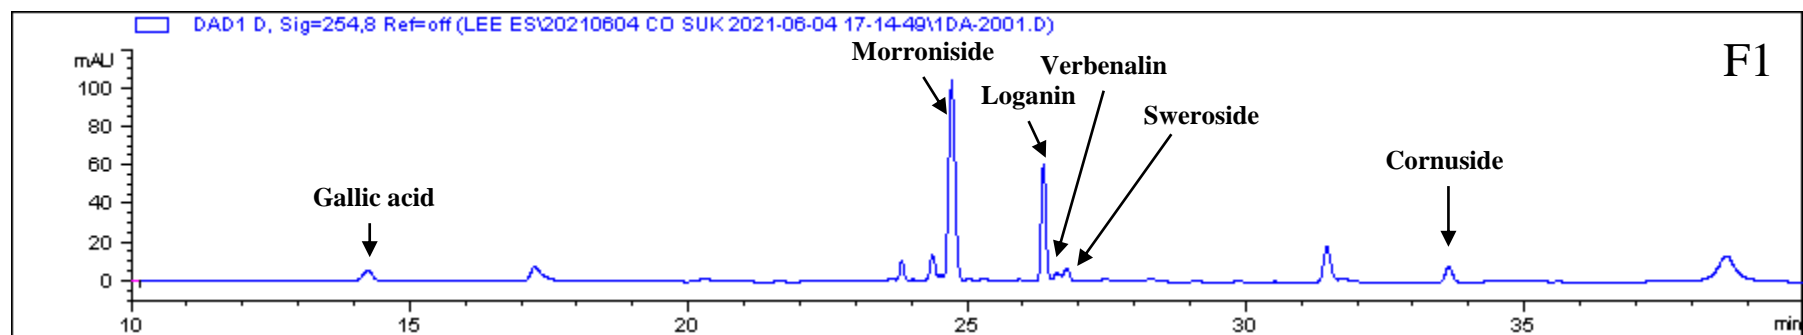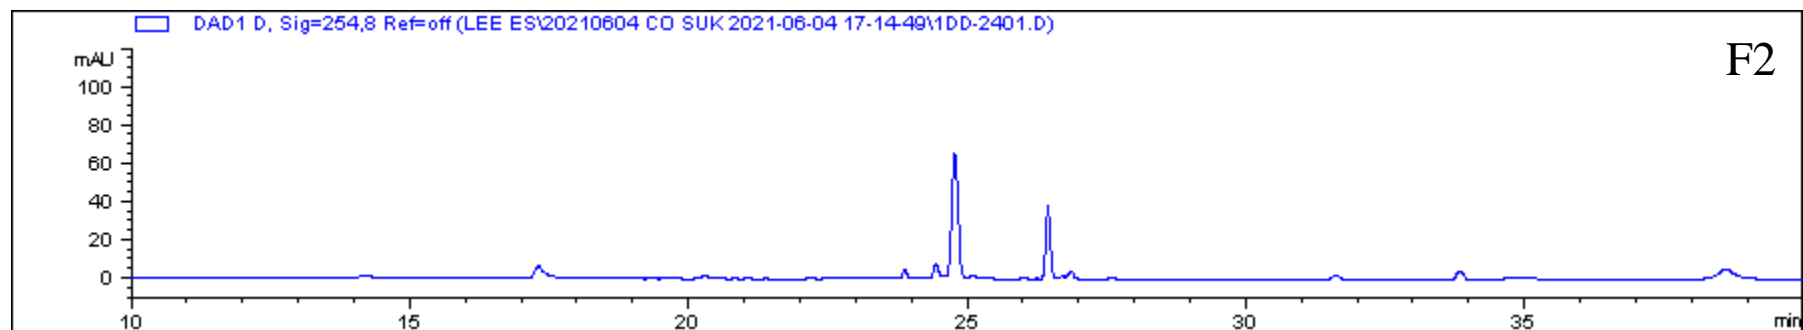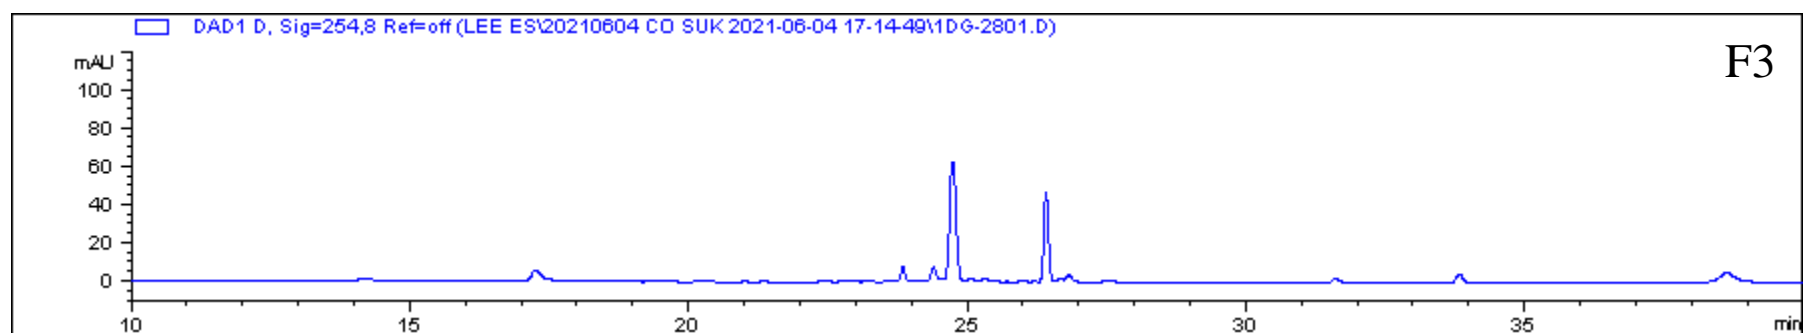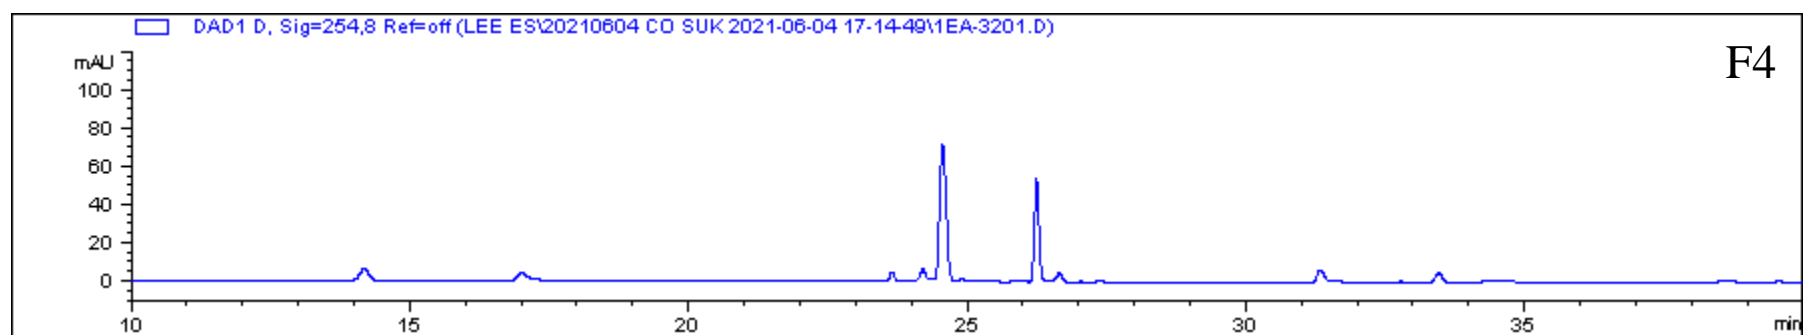

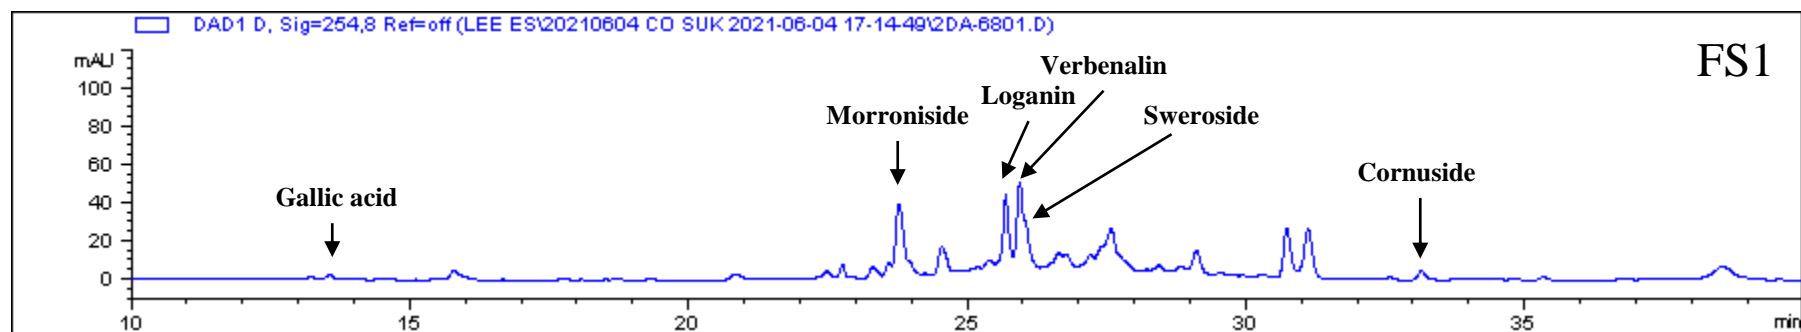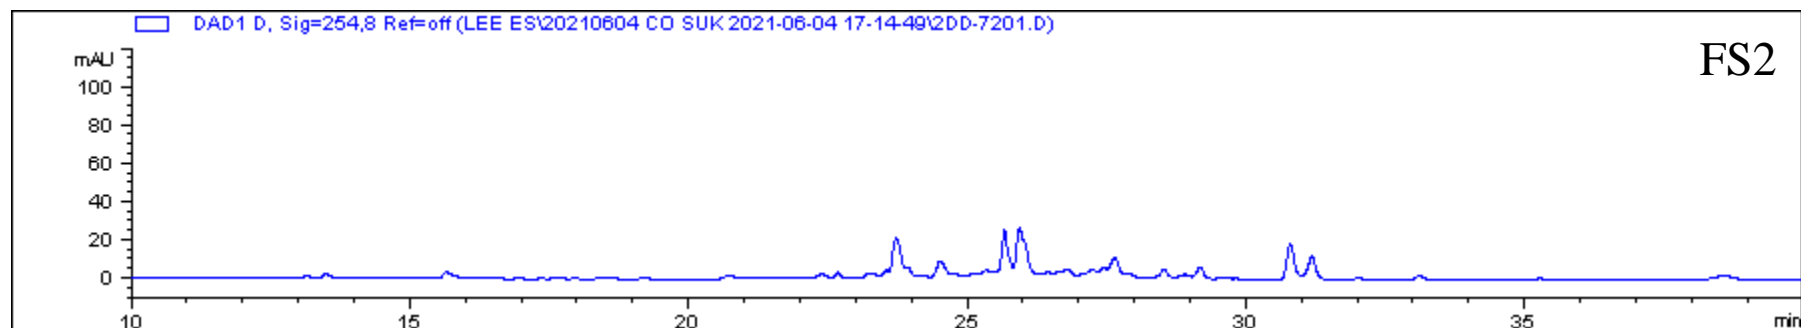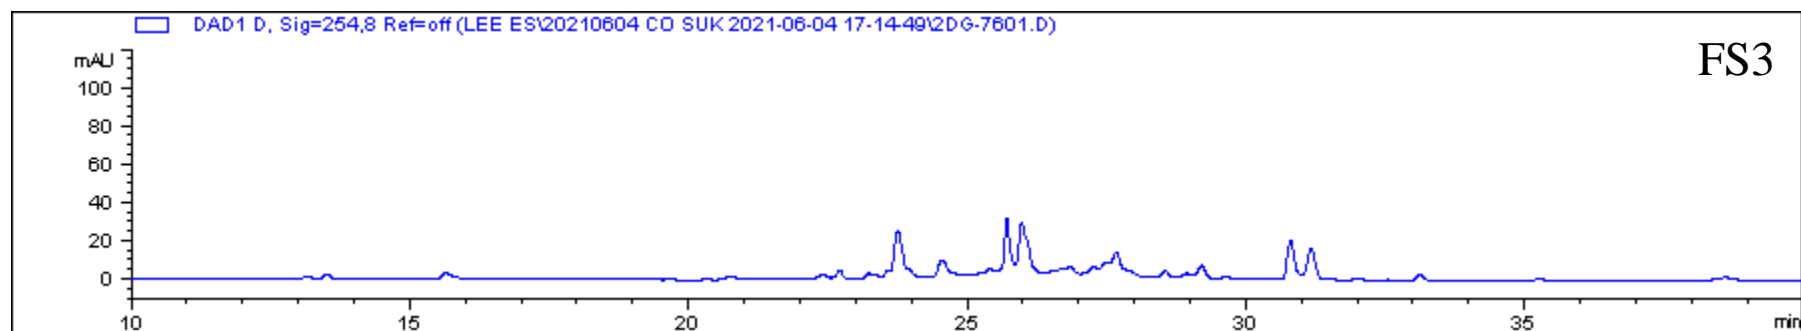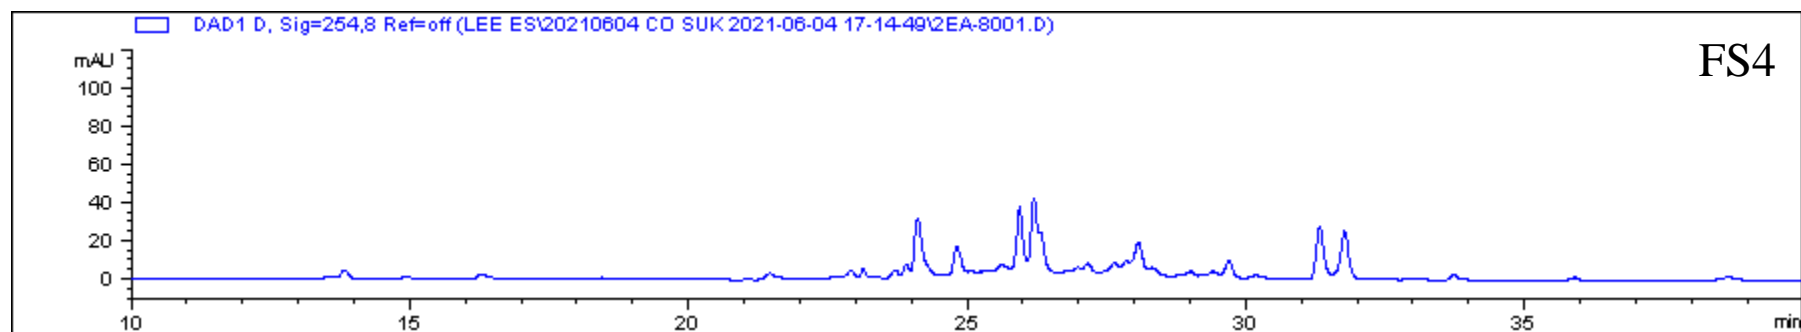

Supplement: s1 [file s1]
